# Supplementary material for: Integrating Spatial Modelling and Space–Time Pattern Mining Analytics for Vector Disease-Related Health Perspectives: A Case of Dengue Fever in Pakistan
Source: MDPI journal article supplement (doi:10.3390/ijerph182212018), 2021-11-16
Supplement: s1 [file s1]

## Supplementary Information For

# Integrating Spatial Modelling and Space–time Pattern Mining Analytics for Vector Disease-Related Health Perspectives: A Case of Dengue Fever in Pakistan

Syed Ali Asad Naqvi <sup>1,\*†</sup>, Muhammad Sajjad <sup>2,†</sup>, Liaqat Ali Waseem <sup>1</sup>, Shoaib Khalid <sup>1</sup>, Saima Shaikh <sup>3</sup> and Syed Jamil Hasan Kazmi <sup>3</sup>

<sup>1</sup> Department of Geography, Government College University Faisalabad, Faisalabad 38000, Pakistan; drliaqataliwaseem@gcuf.edu.pk (L.A.W.); shoaibkhalid@gcuf.edu.pk (S.K.)

<sup>2</sup> Department of Geography, Hong Kong Baptist University, Hong Kong; mah.sajjad@hotmail.com

<sup>3</sup> Department of Geography, University of Karachi, Karachi 75270, Pakistan; saima-ku@uok.edu.pk (S.S.); jkazmi@usa.net (S.J.H.K.)

\* Correspondence: draliasad@gcuf.edu.pk; Tel.: +92-306-6741774

† These authors contributed equally to this study.

## Supplementary Figures

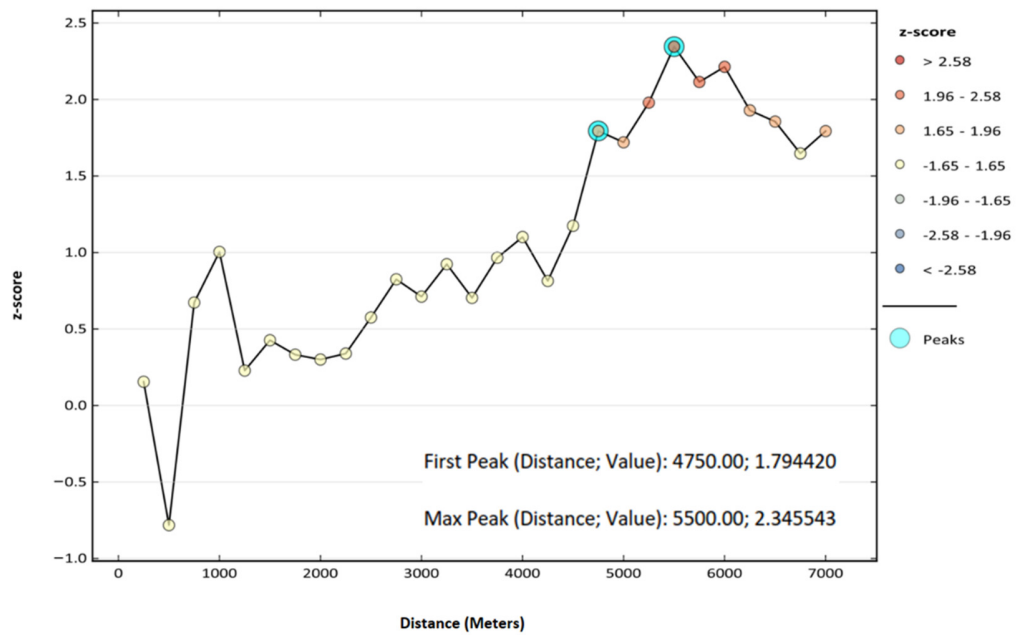

Supplementary Figure S1. Incremental Spatial Autocorrelation results for 2007.

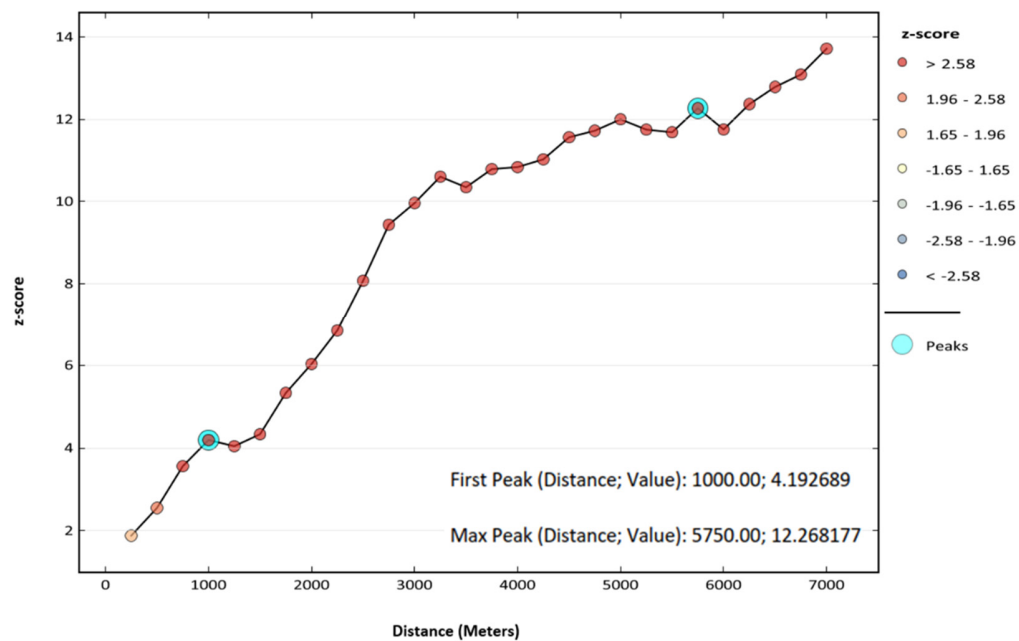

Supplementary Figure S2. Incremental Spatial Autocorrelation results for 2008.

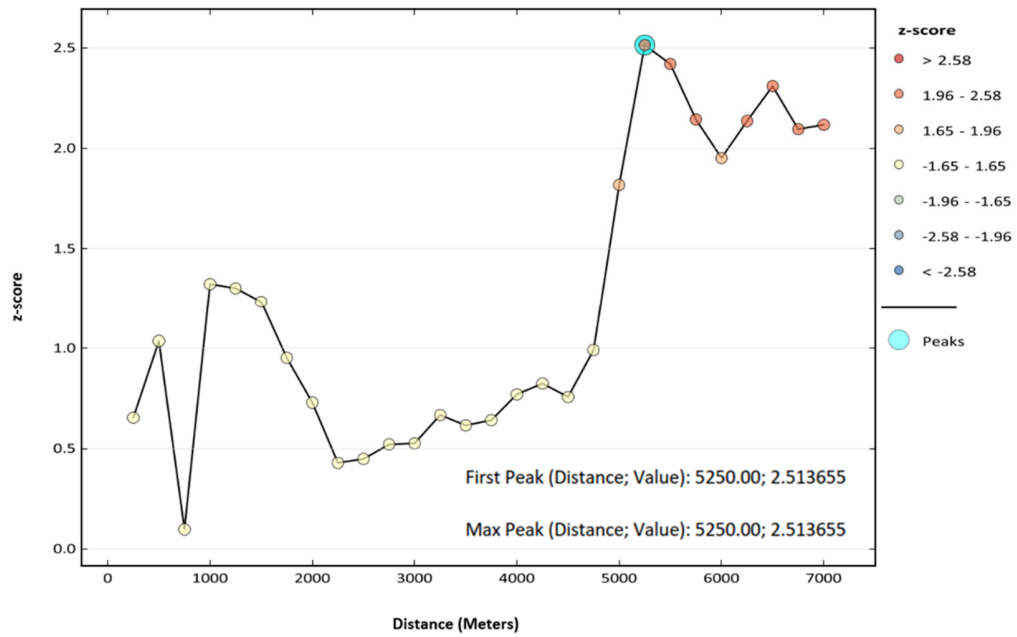

**Supplementary Figure S3.** Incremental Spatial Autocorrelation results for 2009.

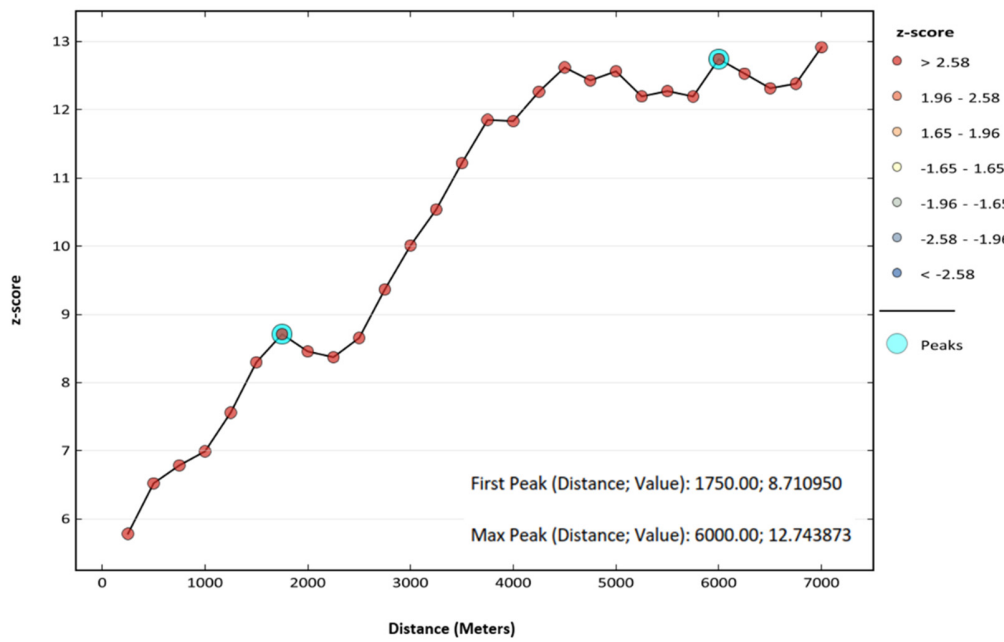

**Supplementary Figure S4.** Incremental Spatial Autocorrelation results for 2010.

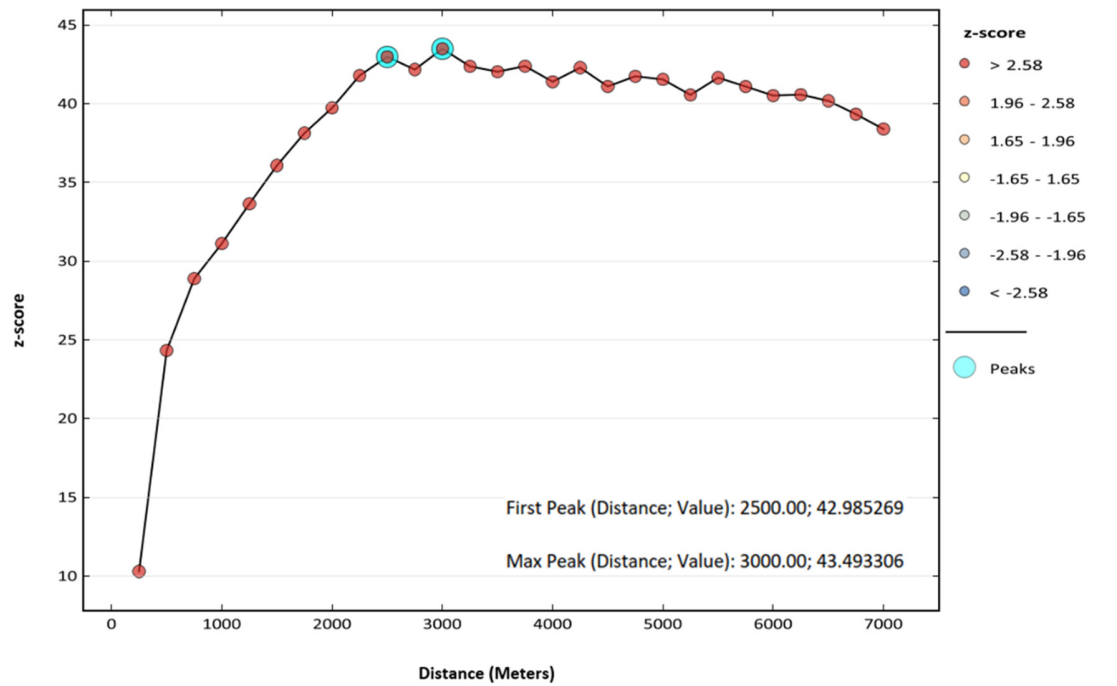

**Supplementary Figure S5.** Incremental Spatial Autocorrelation results for 2011.

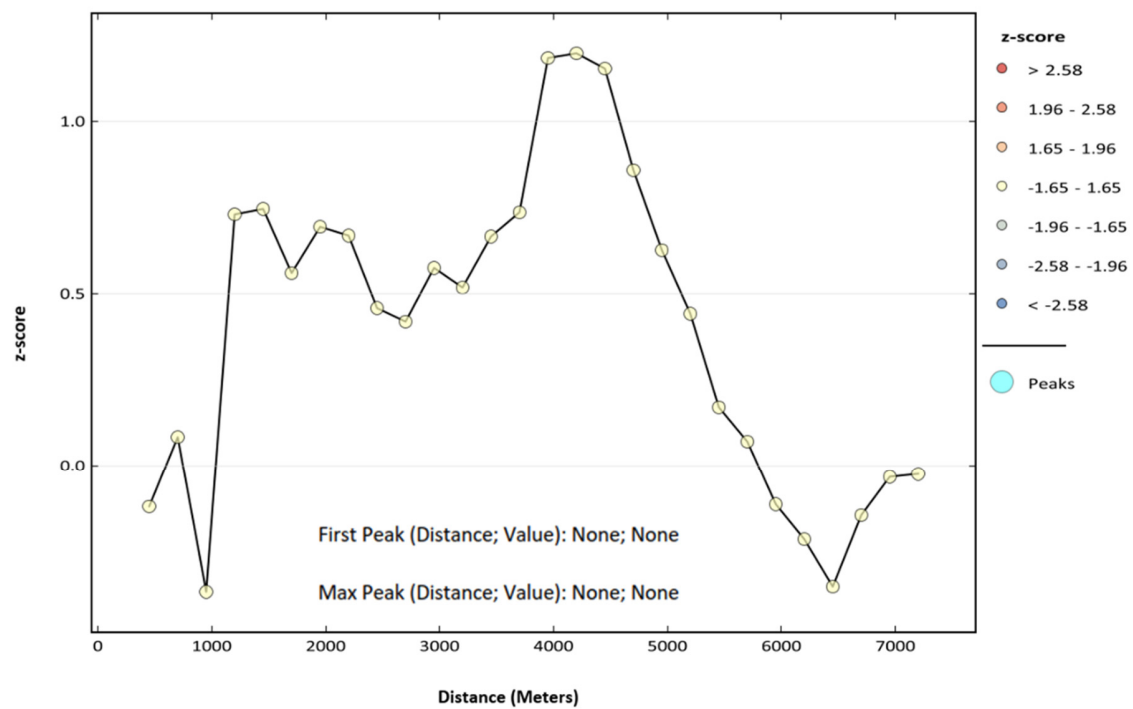

**Supplementary Figure S6.** Incremental Spatial Autocorrelation results for 2012.

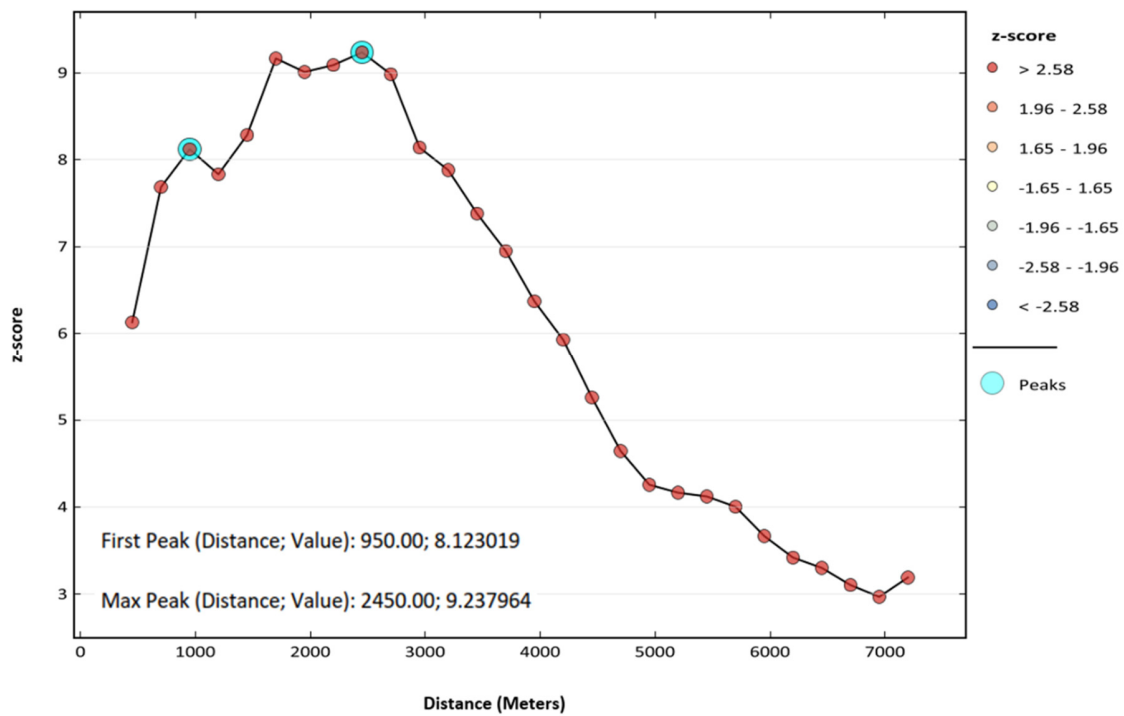

**Supplementary Figure S7.** Incremental Spatial Autocorrelation results for 2013.

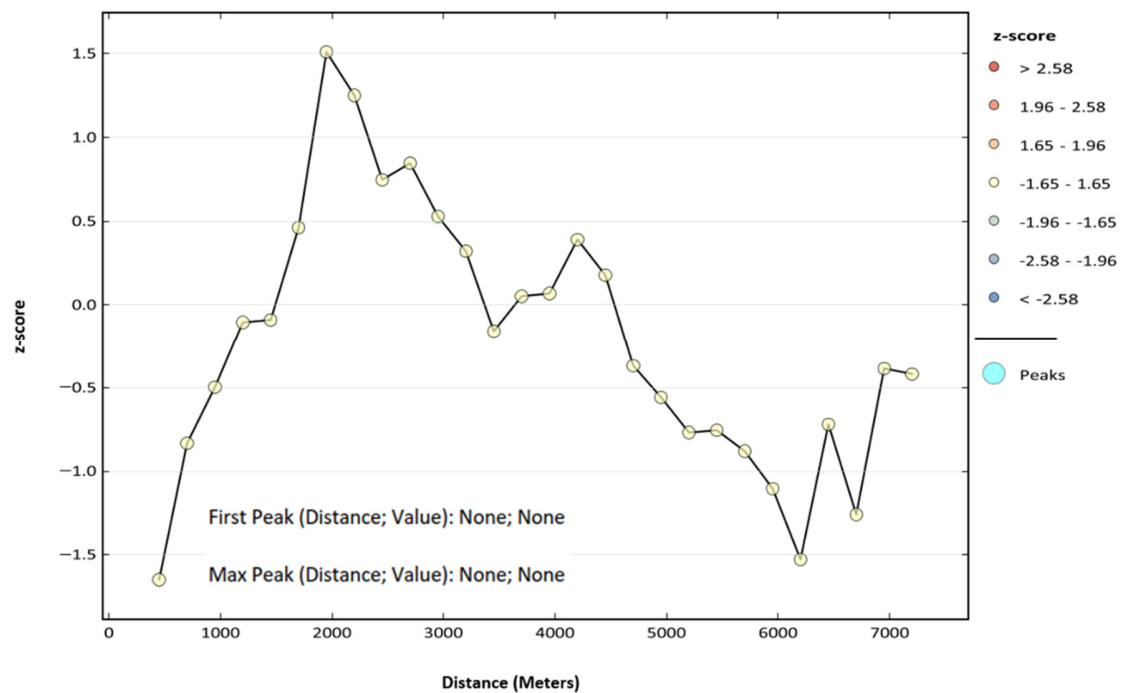

**Supplementary Figure S8.** Incremental Spatial Autocorrelation results for 2014.

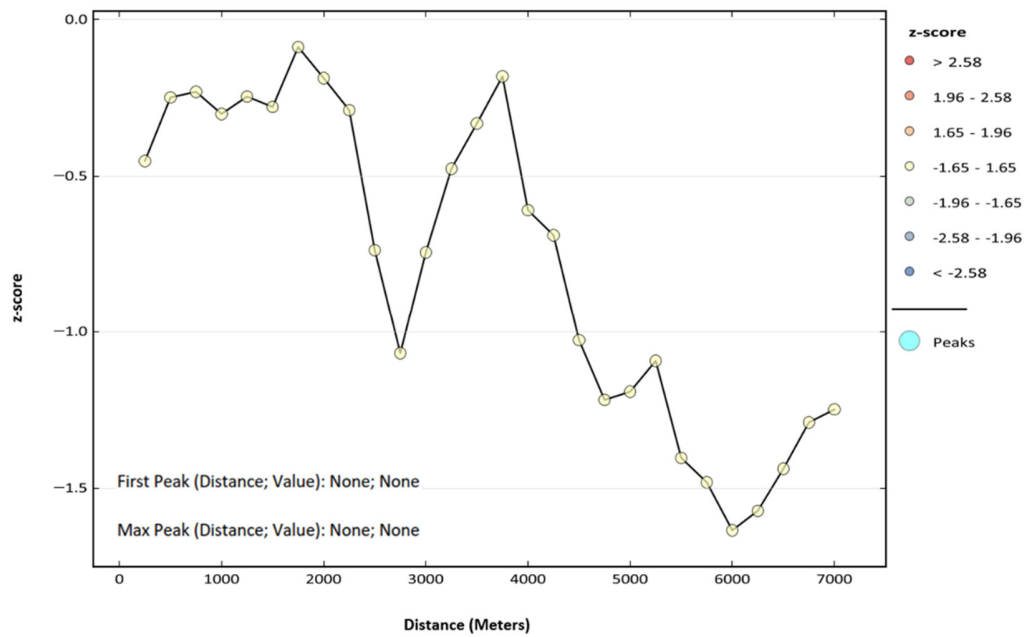

**Supplementary Figure S9.** Incremental Spatial Autocorrelation results for 2015.

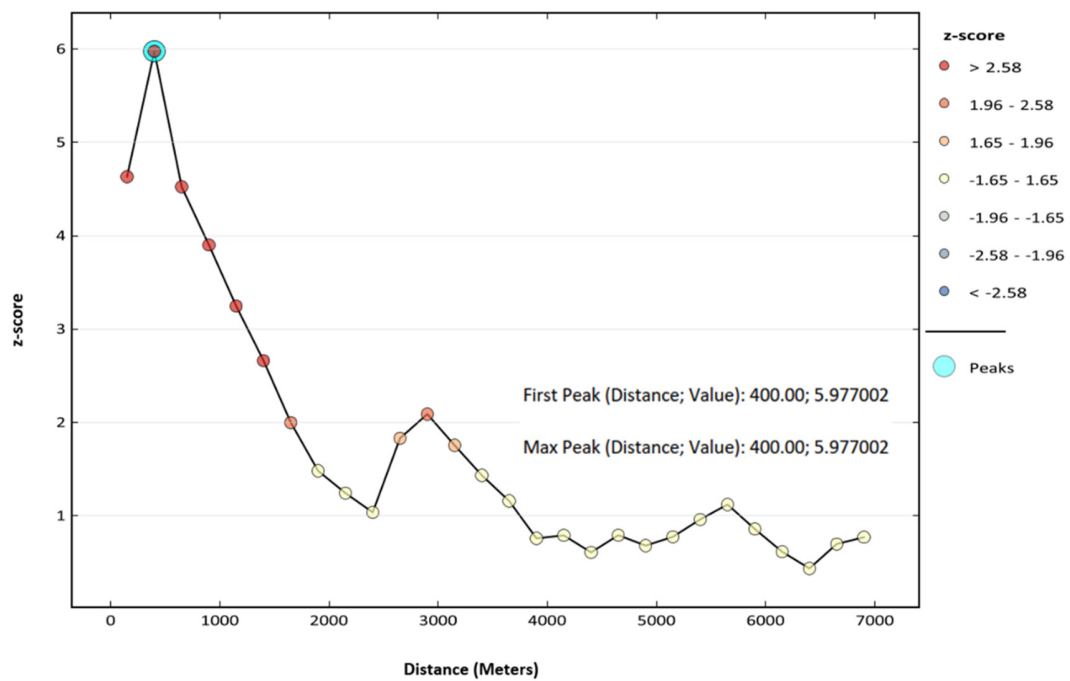

**Supplementary Figure S10.** Incremental Spatial Autocorrelation results for 2016.

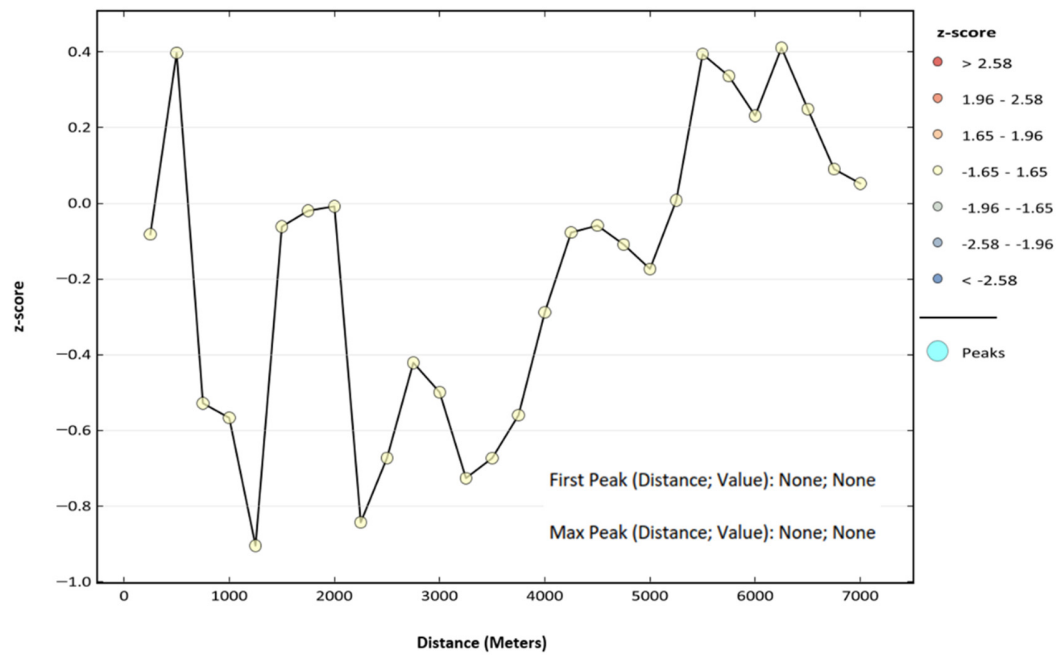

**Supplementary Figure S11.** Incremental Spatial Autocorrelation results for January.

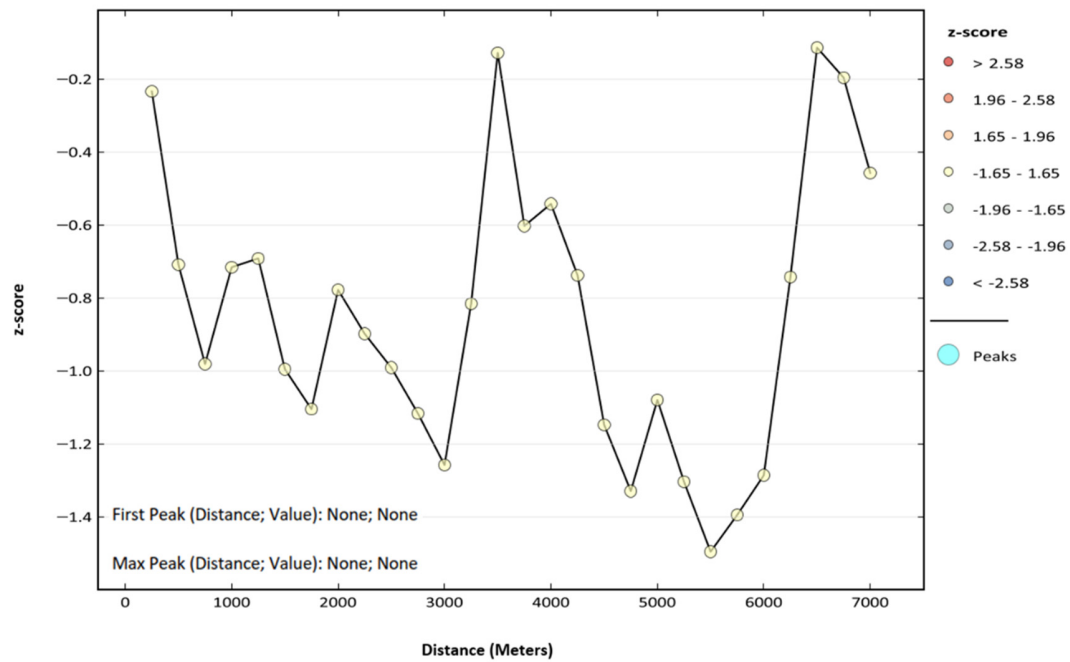

**Supplementary Figure S12.** Incremental Spatial Autocorrelation results for February.

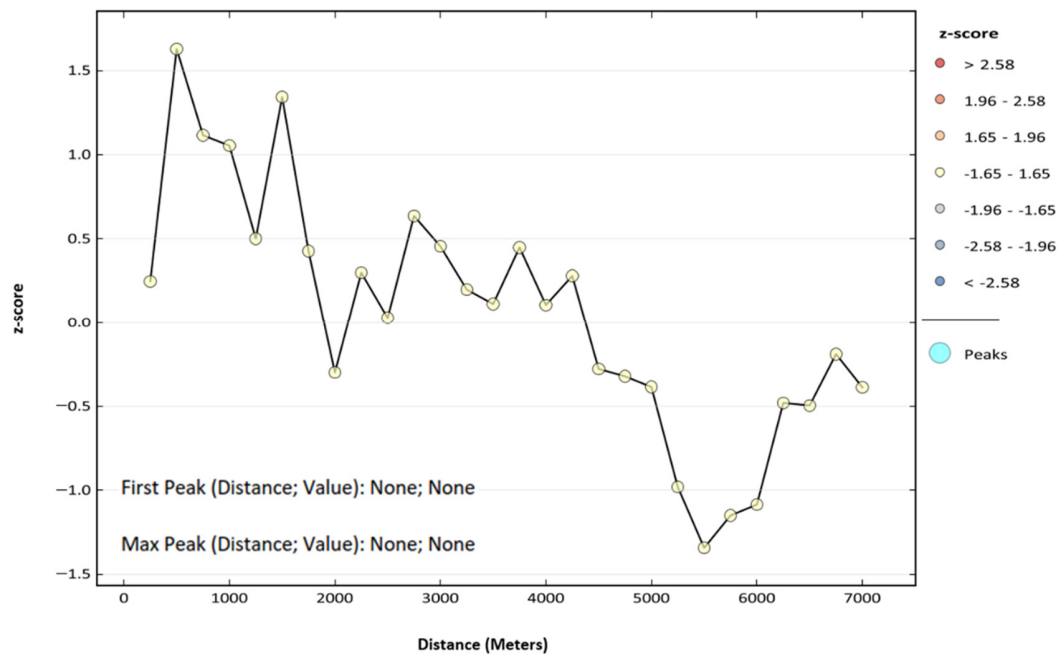

**Supplementary Figure S13.** Incremental Spatial Autocorrelation results for March.

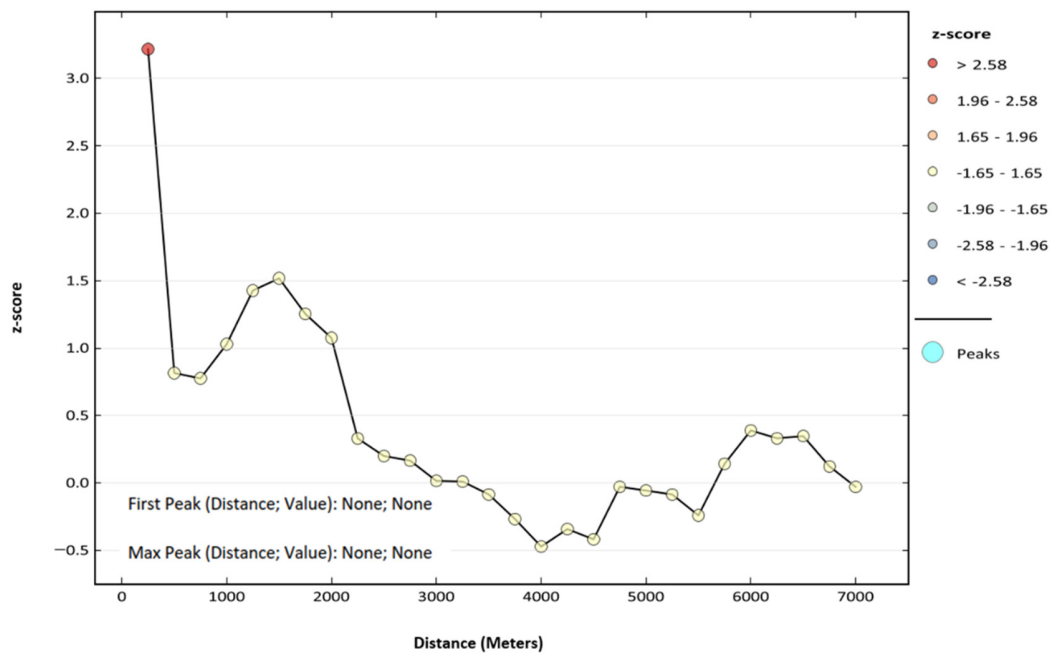

**Supplementary Figure S14.** Incremental Spatial Autocorrelation results for April.



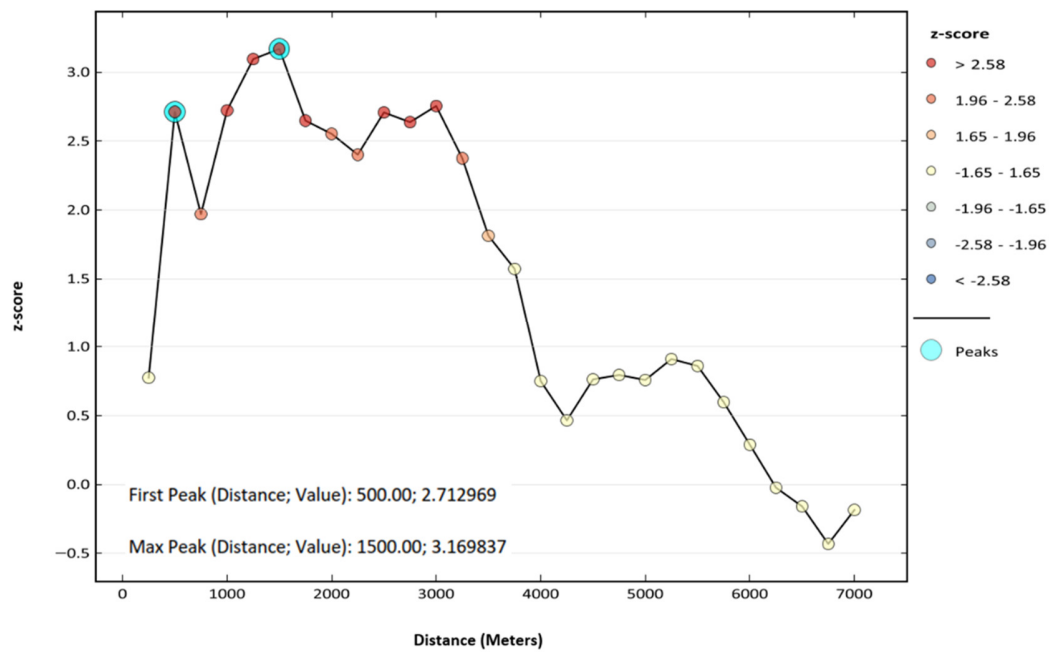

**Supplementary Figure S15.** Incremental Spatial Autocorrelation results for May.

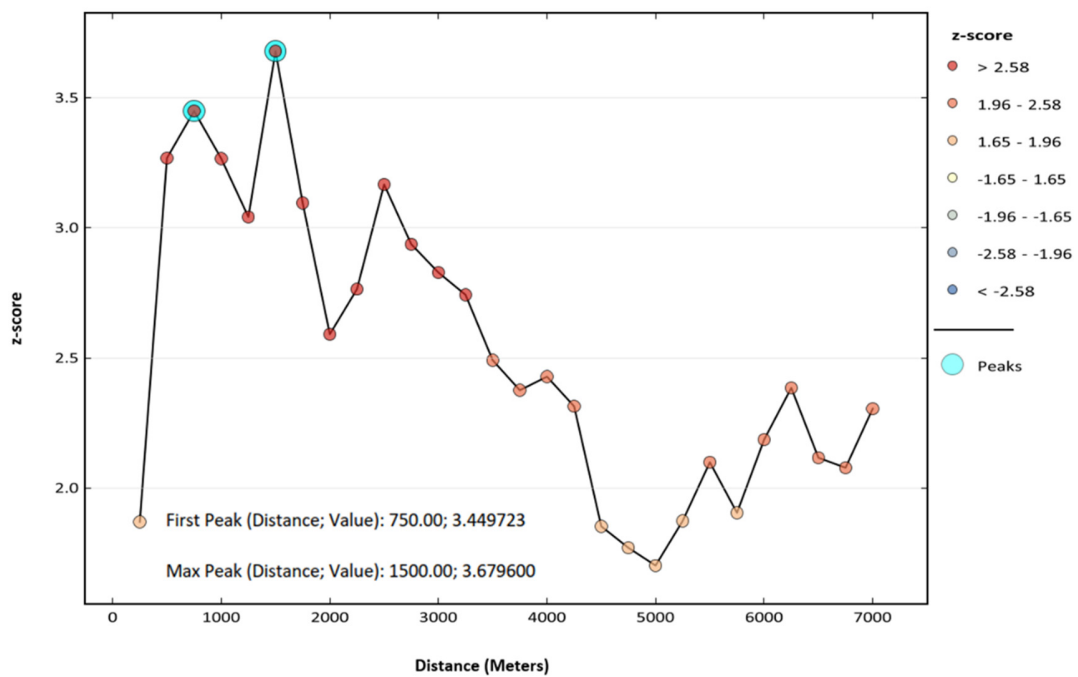

**Supplementary Figure S16.** Incremental Spatial Autocorrelation results for June.

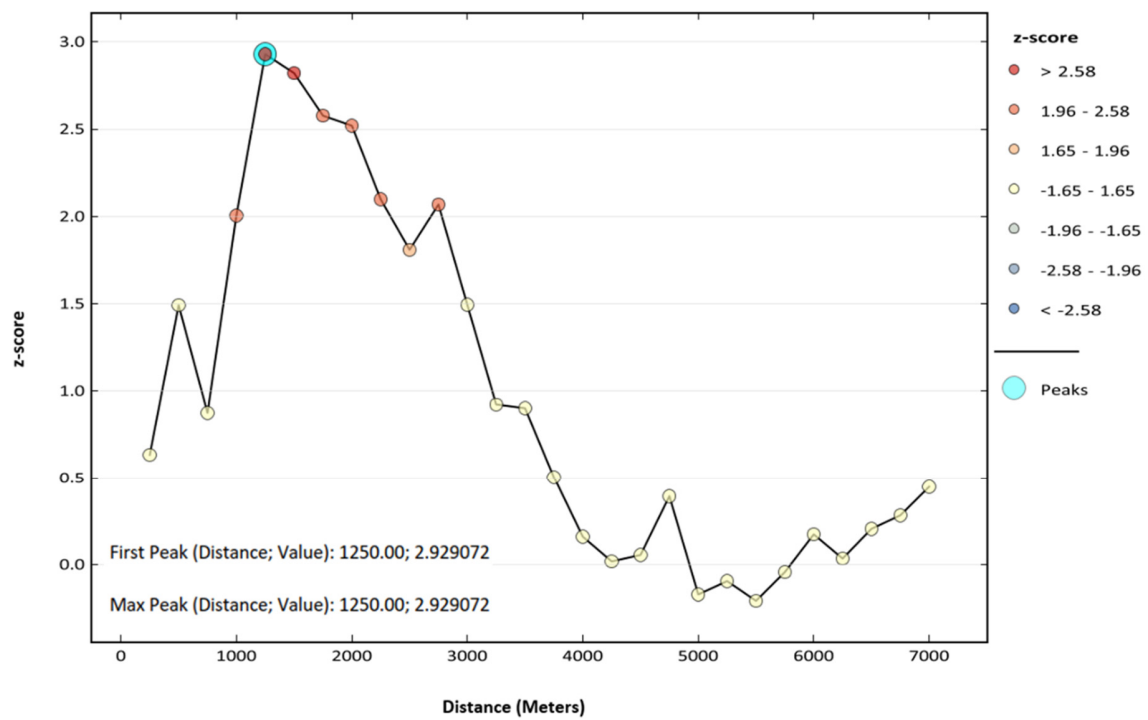

**Supplementary Figure S17.** Incremental Spatial Autocorrelation results for July.

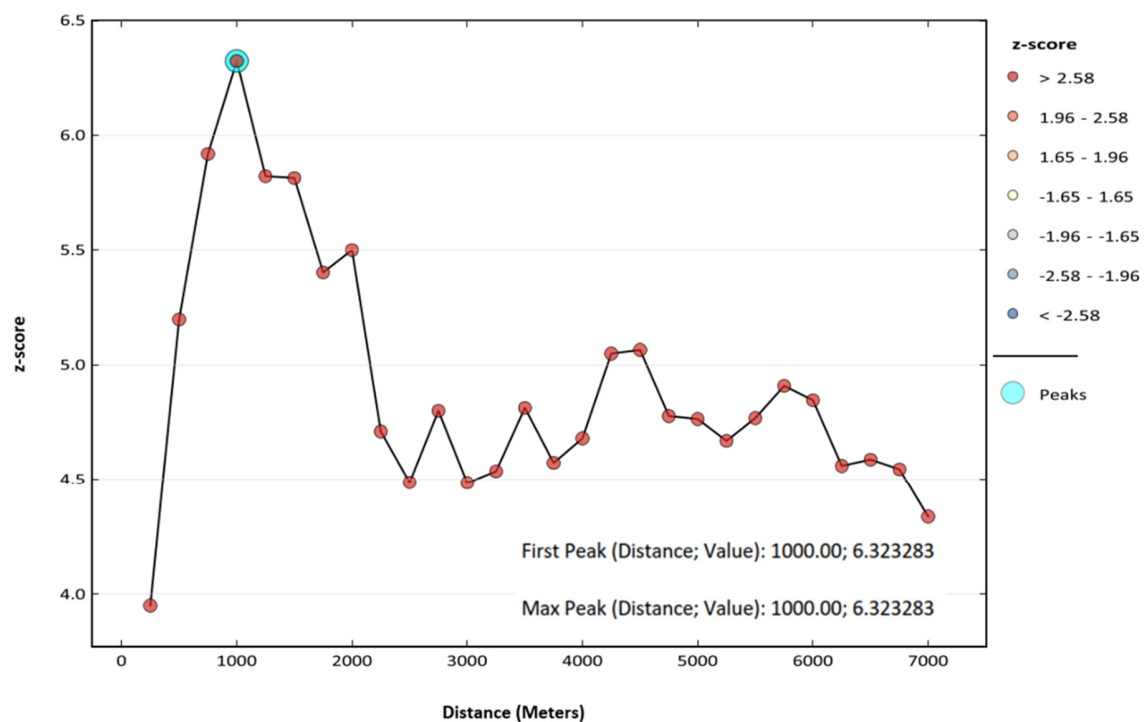

**Supplementary Figure S18.** Incremental Spatial Autocorrelation results for August.

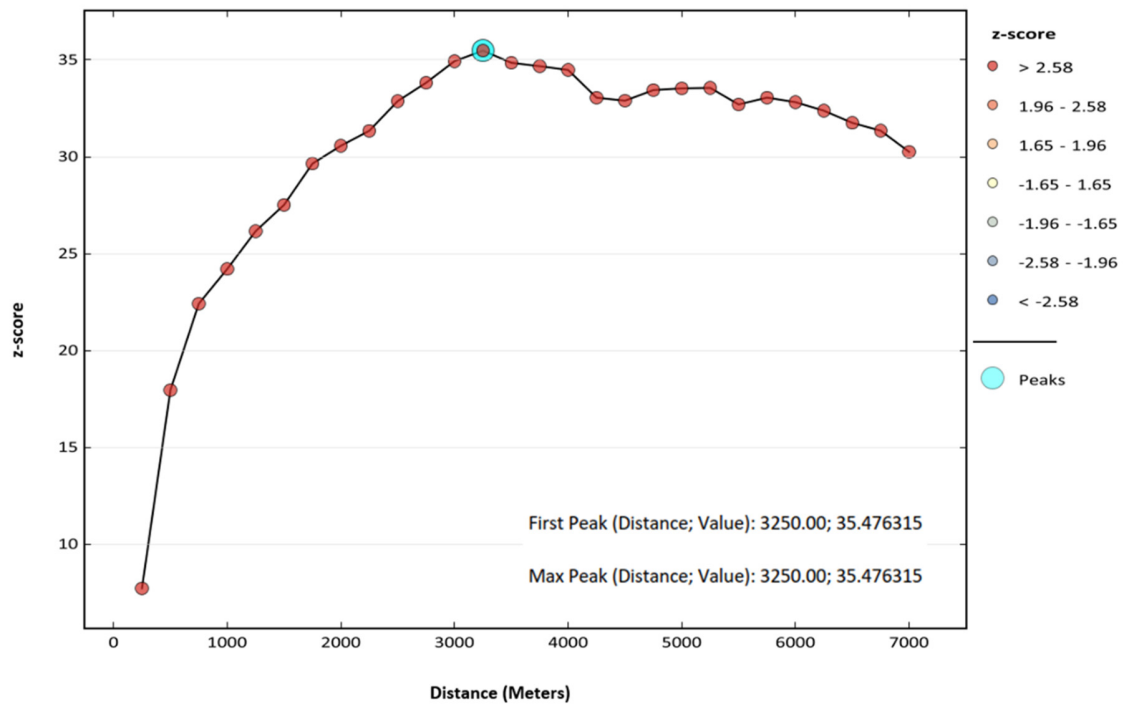

**Supplementary Figure S19.** Incremental Spatial Autocorrelation results for September.

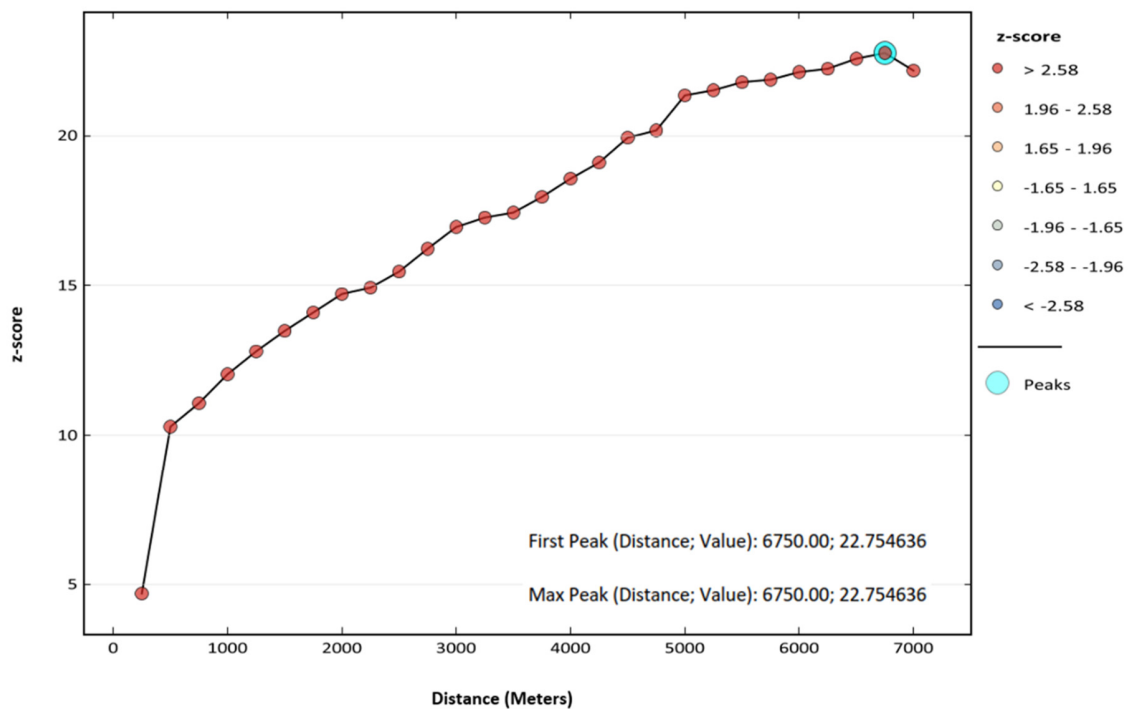

**Supplementary Figure S20.** Incremental Spatial Autocorrelation results for October.

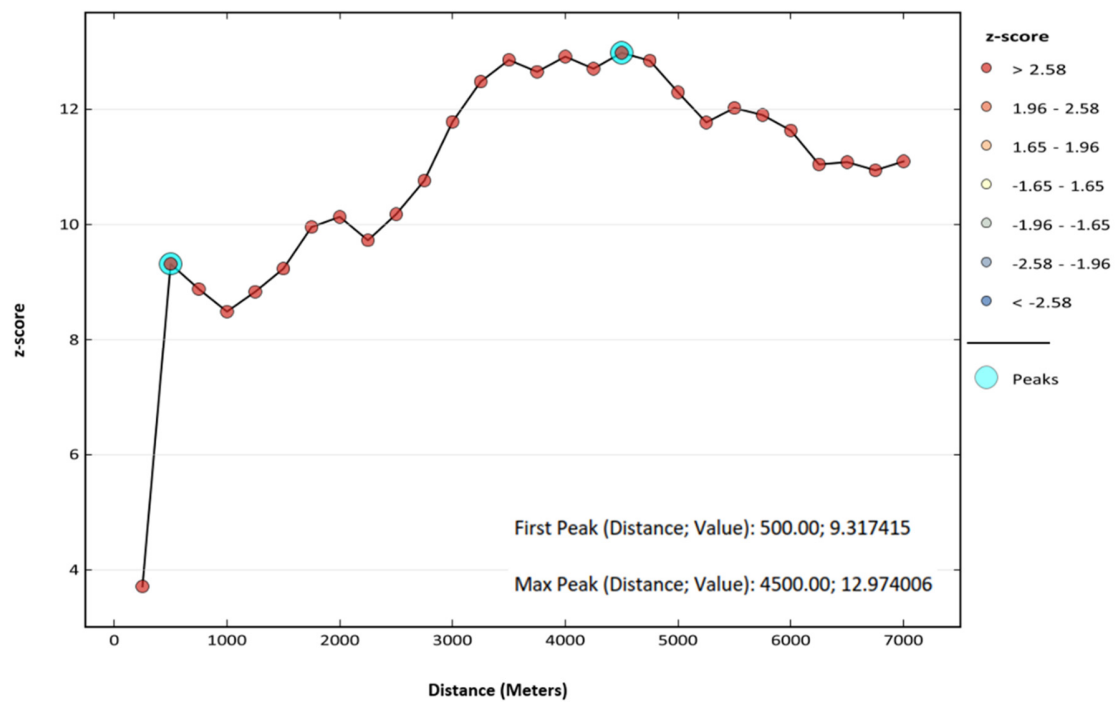

**Supplementary Figure S21.** Incremental Spatial Autocorrelation results for November.

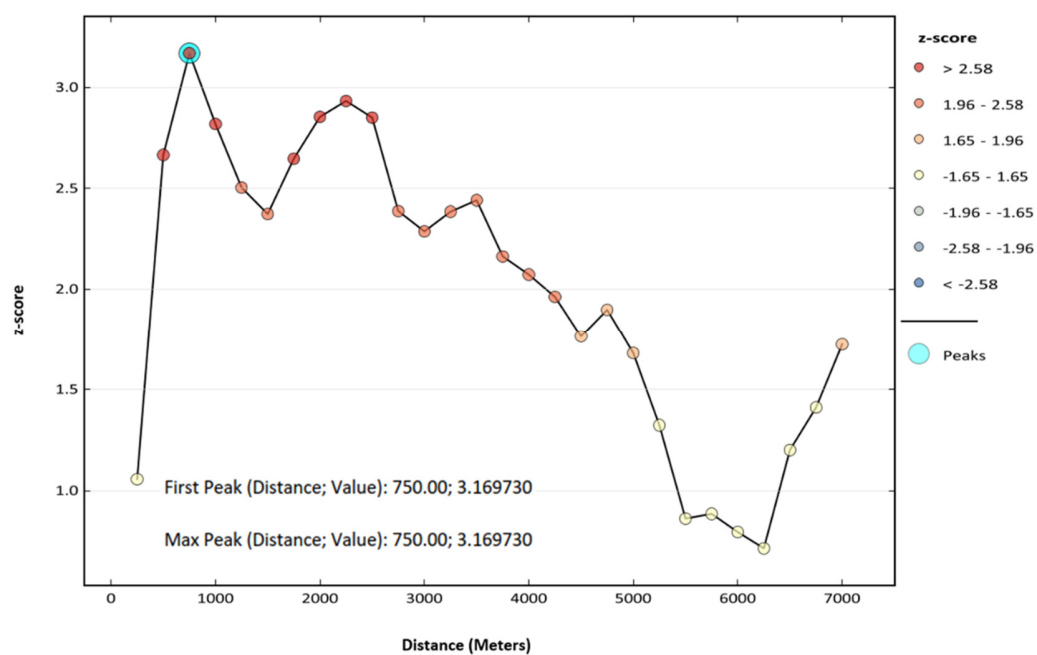

**Supplementary Figure S22.** Incremental Spatial Autocorrelation results for December.

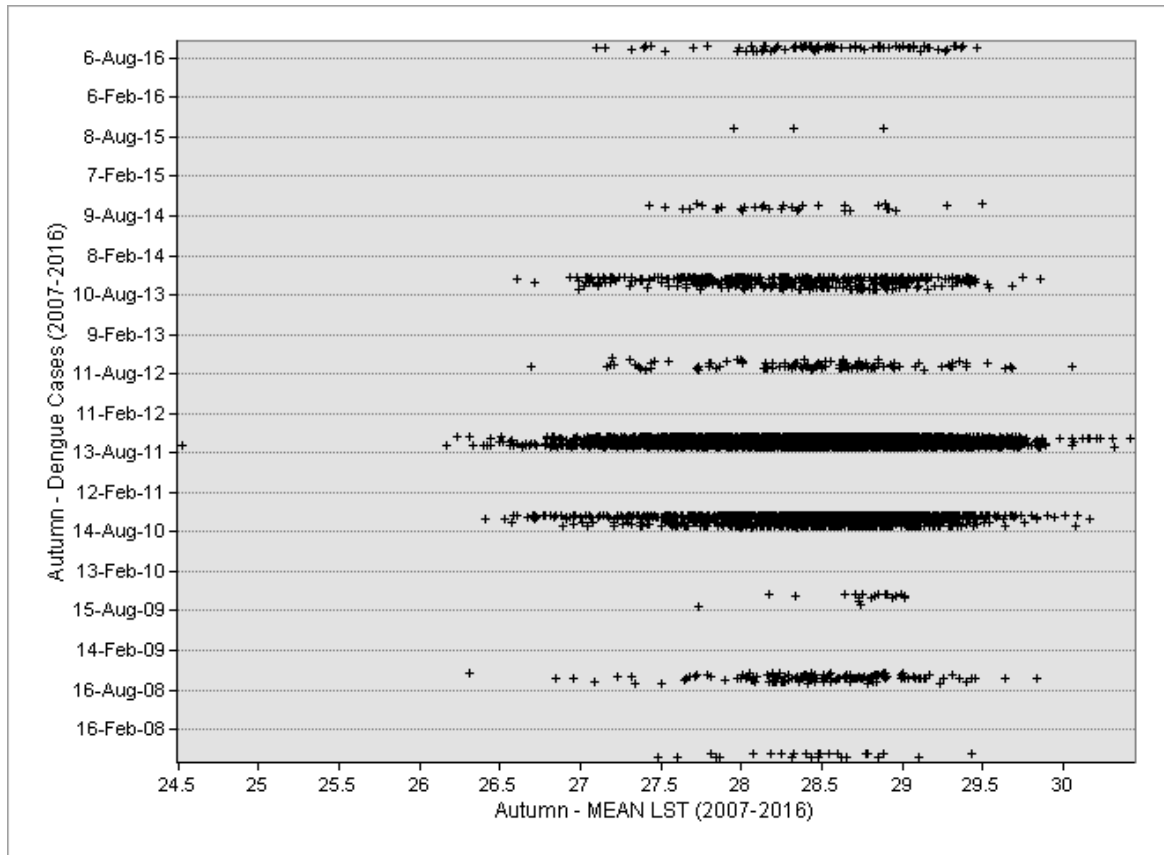

**Supplementary Figure S23.** Dengue cases in autumn season (2007-2016) vs corresponding LST. (2007-2016).

## Supplementary Tables

**Supplementary Table S1.** Descriptive statistics of statistically significant hotspots and cold-spots on annual basis.

| Period | Hotspots ( <i>z-score</i> )          |       |      |            | Cold-spots ( <i>z-score</i> )        |       |      |            |
|--------|--------------------------------------|-------|------|------------|--------------------------------------|-------|------|------------|
|        | Significant <i>z-score</i> (Min-Max) | Mean  | SD   | Total Bins | Significant <i>z-score</i> (Min-Max) | Mean  | SD   | Total Bins |
| 2007   | 2.19 to 3.34                         | 2.57  | 0.29 | 54         | ---                                  | ---   | ---  | None       |
| 2008   | 1.72 to 7.79                         | 5.10  | 1.56 | 476        | -6.41 to -1.71                       | -4.37 | 1.23 | 112        |
| 2010   | 1.78 to 9.35                         | 5.99  | 1.79 | 816        | -5.82 to -1.77                       | -4.08 | 1.24 | 349        |
| 2011   | 1.83 to 18.40                        | 10.19 | 5.26 | 1301       | -8.30 to -1.84                       | -4.03 | 1.51 | 1064       |
| 2013   | 1.97 to 7.30                         | 3.69  | 0.87 | 309        | -3.43 to -1.98                       | -2.56 | 0.32 | 145        |
| 2016   | 2.51 to 6.28                         | 3.87  | 1.12 | 58         | None                                 | None  | None | None       |

**Supplementary Table S2.** Descriptive statistics of statistically significant hotspots and cold-spots on monthly basis.

| Period    | Hotspots ( <i>z-score</i> )          |       |      |            | Cold-spots ( <i>z-score</i> )        |        |       |            |
|-----------|--------------------------------------|-------|------|------------|--------------------------------------|--------|-------|------------|
|           | Significant <i>z-score</i> (Min-Max) | Mean  | SD   | Total Bins | Significant <i>z-score</i> (Min-Max) | Mean   | SD    | Total Bins |
| August    | 2.31 to 4.95                         | 3.30  | 0.65 | 219        | -2.37 to -2.36                       | -2.365 | 0.005 | 02         |
| September | 1.89 to 18.22                        | 10.02 | 4.79 | 709        | -5.62 to -1.87                       | -3.10  | 0.95  | 841        |
| October   | 1.69 to 13.64                        | 8.11  | 3.12 | 1129       | -8.83 to -1.71                       | -5.46  | 1.81  | 806        |
| November  | 1.82 to 10.94                        | 5.90  | 2.37 | 735        | -5.53 to -1.82                       | -3.20  | 0.99  | 586        |
| December  | 2.13 to 3.87                         | 2.93  | 0.43 | 211        | -2.81 to -2.15                       | -2.41  | 0.20  | 11         |
